# Supplementary material for: CuS nanotrough-networks for highly stable transparent conducting electrodes
Source: Royal Society of Chemistry journal article supplement (doi:10.1039/c6tc01010e), 2016-01-01
Supplement: c6tc01010e4.pdf [file c6tc01010e4.pdf]

## SUPPORTING INFORMATION

### **CuS Nanotrough-Networks for Highly Stable Transparent Conducting**

#### **Electrodes**

Xiaojia Zhang<sup>a†</sup>, Wenxi Guo<sup>a,b†</sup>, Guoyun Gao<sup>a</sup>, Miaoling Que<sup>a</sup>, Caofeng Pan<sup>a\*</sup>, Zhong Lin Wang<sup>a\*</sup>

a. Beijing Institute of Nanoenergy and Nanosystems, Chinese Academy of Sciences; National Center for Nanoscience and Technology (NCNST), Beijing, 100083, P. R. China

b. Research Institution for Biomimetics and Soft Matter and department of physics, Xiamen University, Xiamen, 361005, PR China.

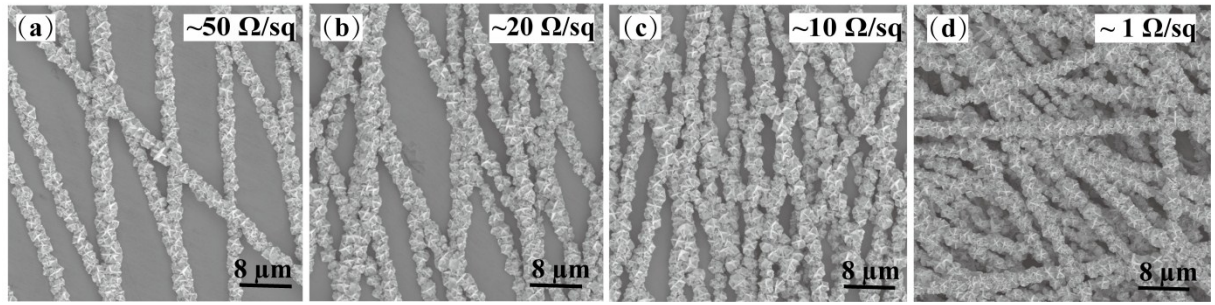

Fig. S1 SEM images of CuS NNs with different densities. The different densities of CuS NNs lead to different sheet resistances: (a) 50/sq, (b) 20/sq, (c) 10/sq, (d) 1Ω/sq.

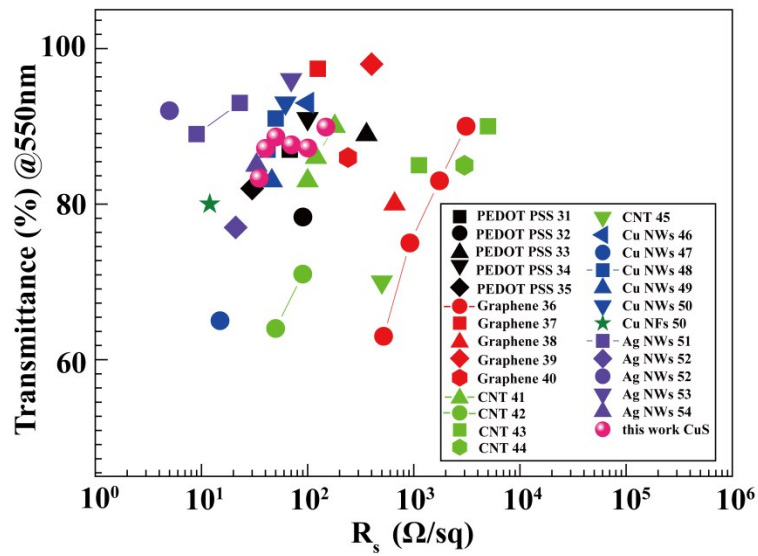

Fig. S2 Plot of transmittance versus sheet resistance for the various alternatives to ITO.

Table S1. Comparison of transparent conducting materials and their performance relative to ITO.

| TCEs           | T(at 550 nm) | $R_s$ ( $\Omega$ /sq) | ITO Level Performance | Example          |
|----------------|--------------|-----------------------|-----------------------|------------------|
| Ag NWs         | 91           | 19                    | YES                   | 52               |
| Ag NWs-1       | 90.2         | 9                     | YES                   | 51               |
| Cu NWs         | 88           | 48                    | YES                   | 49               |
| CNT            | 79.3         | 70                    | NO                    | 42               |
| Graphene       | 86           | 242                   | NO                    | 40               |
| <b>CuS TCE</b> | <b>88.6</b>  | <b>50.4</b>           | <b>YES</b>            | <b>This work</b> |

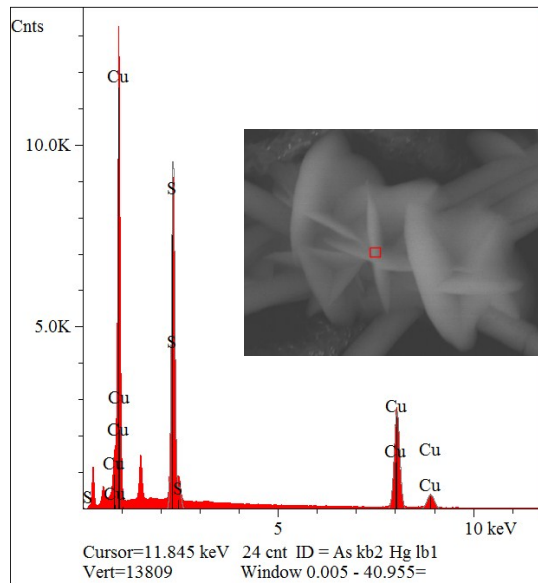

Fig. S3 EDS spectrum of The CuS NS after 12 h sulfur treatment.

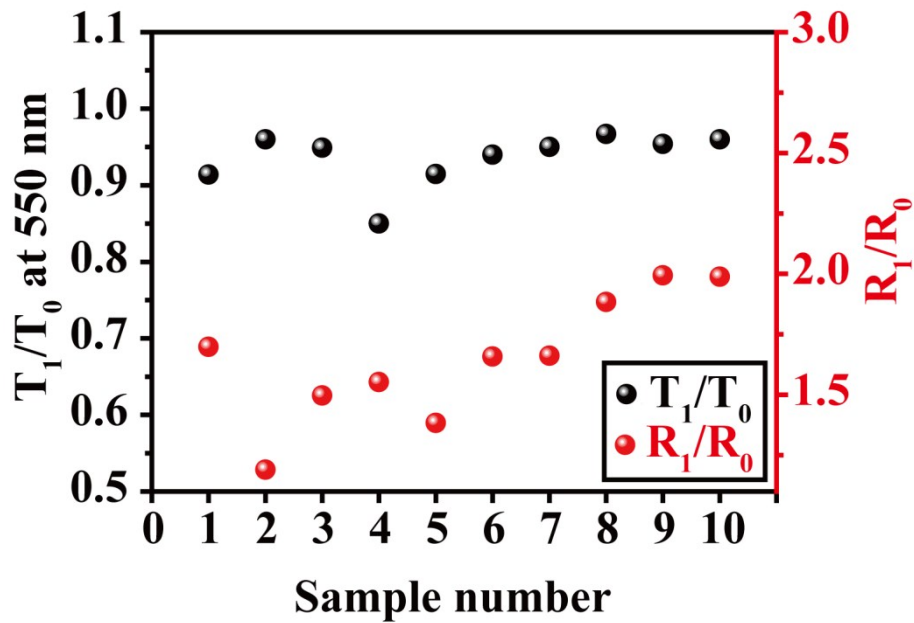

Fig. S4 The normalized sheet resistance ( $R_1/R_0$ ) and transmittance ( $T_1/T_0$ ) before and after 24h sulphur deposition of ten Cu NNs electrodes.

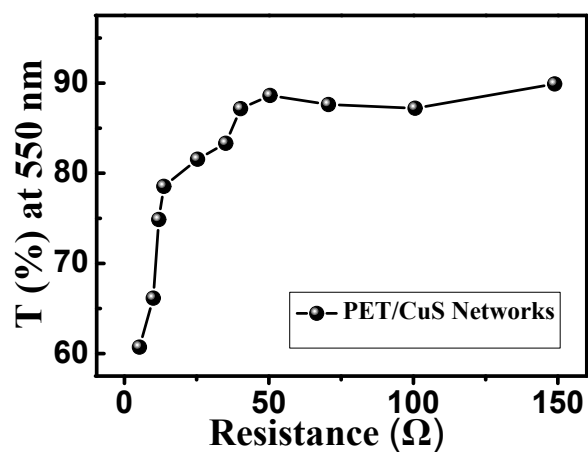

Fig. S5 Sheet resistance versus optical transmission (at 550 nm) of CuS NNs TCEs.

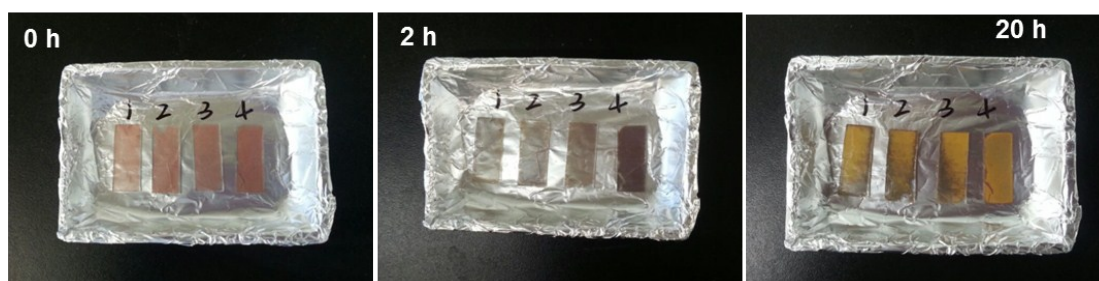

Fig. S6 The changes in colors of Cu NNs TCEs with different layers at 160 °C for 0 h, 2 h and 20 h.

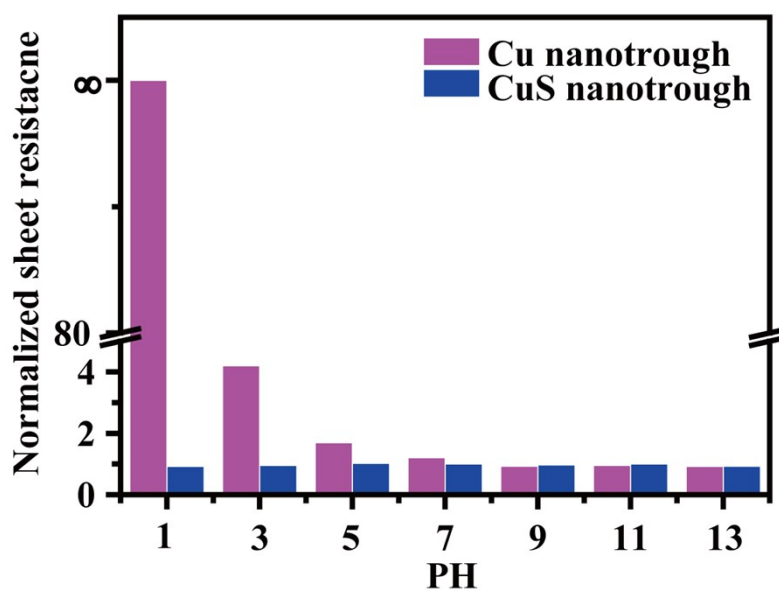

Fig. S7 Normalized sheet resistance vs different PH value of the Cu and the CuS NNs electrode.

**CuS/PET**

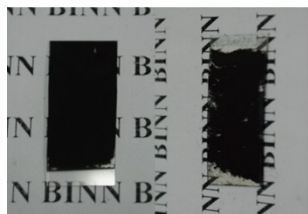

**Cu nanotrough/PET**

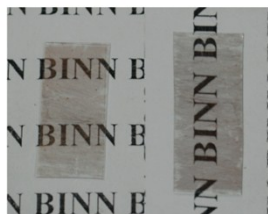

**CuS nanotrough/PET**

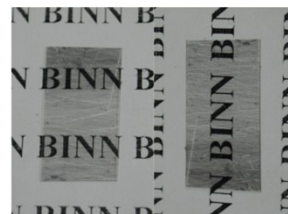

Fig. S8 the photographs before (left side) and after (right side) bend test of the CuS/PET, Cu nanotrough/PET and CuS nanotrough/PET electrode.
